# Supplementary material for: The Computer-Assisted Brief Intervention for Tobacco (CABIT) Program: A Pilot Study
Source: PubMed Central journal article supplement (PMC3799483; doi:10.2196/jmir.2074), 2012-12-03
Supplement: jmir_v14i6e163_app2.pdf [file jmir_v14i6e163_app2.pdf]

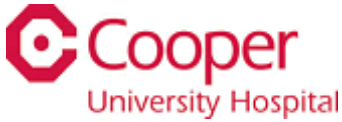

## Tobacco Use: Healthcare Provider Report

**\*\*This report should be placed in the patient's medical record\*\***

|                                    |                                                 |
|------------------------------------|-------------------------------------------------|
| <b>Patient:</b> SMITH, JOHN        | <b>Date of Birth:</b> 01/31/1970 (42 years old) |
| <b>Assessment date:</b> 05/28/2012 | <b>Location:</b> CABIT Reviewer Site            |

This is a summary of a confidential assessment for the patient named above. It is designed to assist healthcare providers in providing tobacco counseling. Please review the information with the patient and sign in the space provided at the bottom of the report. The patient also should be given his/her Patient Feedback Report, which includes treatment resources for tobacco users.

### Ask/Assess

Lifetime tobacco use: Yes

Current use/Amount: 11-20 cigarettes / day

Years used: 27

Tobacco-related illness/symptoms: chest pain, high blood pressure, asthma, acid reflux or heartburn, upper respiratory infection or cold, coughing in the morning, sleep problems

Methods used to quit in past: cold turkey (quit without help), nicotine gum

Readiness to quit: Ready to quit in the next 6 months (Contemplator)

Interested in counseling or medication from  
healthcare provider: Yes

### Healthcare Provider Should Advise/Assist

1. Inform the patient that quitting tobacco is one of the most important things he or she can do to improve his or her health.
2. Elicit change talk by having the patient describe the positive consequences anticipated if he or she quits.
3. At the patient's request, the patient's report also provides information about: group / individual tobacco cessation treatment

### Refer/Arrange

- A tailored motivational report was printed for the patient.
- The patient viewed a stage-based video intervention.
- A faxed referral was sent to the referral source indicated with an "\*".

|                                              |                                                                           |                                                            |
|----------------------------------------------|---------------------------------------------------------------------------|------------------------------------------------------------|
| * Cooper University Hospital<br>856-757-7736 | National Toll Free Smokers Quitline<br>1-800-QUIT-NOW<br>(1-800-784-8669) | American Cancer Society<br>1-800-ACS-2345 (1-800-227-2345) |
|----------------------------------------------|---------------------------------------------------------------------------|------------------------------------------------------------|

Healthcare Provider signature: \_\_\_\_\_ Date: \_\_\_\_\_

I reviewed and agree with the above assessment.

Provided counseling for:

0-3 minutes       3-10 minutes       More than 10 minutes       Did not counsel

Assessment Administrator Signature: \_\_\_\_\_ Date: \_\_\_\_\_

*This report reflects only the information supplied by the patient and is not intended to replace clinical judgment. The physician retains full responsibility for decisions regarding treatment. © 2008 Polaris Health Directions, all rights reserved. Contact Polaris at: (267) 583-6336 - info@polarishealth.com - www.polarishealth.com*
