# Supplementary material for: The Computer-Assisted Brief Intervention for Tobacco (CABIT) Program: A Pilot Study
Source: PubMed Central journal article supplement (PMC3799483; doi:10.2196/jmir.2074), 2012-12-03
Supplement: jmir_v14i6e163_app3.pdf [file jmir_v14i6e163_app3.pdf]

Cooper University Hospital  
One Cooper Plaza  
Camden, New Jersey 08103  
Telephone: 856-757-7736  
Fax: 856-757-9651

# Fax Cover Sheet

**TO:** Nelson Byrne, Ph.D.

**FROM:** Cooper University Hospital  
Behavioral Medicine  
856-673-4254

**ORGANIZATION:** Cooper University Hospital

**DATE:** 05/28/2012

**NUMBER OF PAGES:** (including cover) 2

## CONFIDENTIAL PATIENT INFORMATION

This information is being sent to you following a patient assessment conducted at Cooper University Hospital in Camden, NJ.

A patient that appears appropriate for your program / services has requested treatment. A report summarizing the results of the patient's assessment and providing contact information is attached. Please contact this individual within

**WARNING:** Unauthorized interception or use of this fax could be a violation of Federal and State law. If you have received this information in error, please notify the sender immediately.

This fax may contain confidential information belonging to the sender and may be used only for the purpose for which it was requested or intended. You are responsible for securing any confidential information.

This fax may contain health care information. Permission to use or disclose this information has been granted either by law or the patient. Further use or disclosure without additional patient authorization or as otherwise permitted by law is

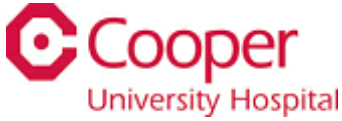

**\*\*Tobacco Treatment Referral\*\***  
**Please contact the patient as soon as possible**

**To:** Nelson Byrne, Ph.D.

**Fax #:** 856-757-9651

**Date:** 05/28/2012

**Referred From:** CABIT Reviewer Site

**Phone #:** 856-757-7736

The patient below requested a referral for treatment and was told that someone from your organization would call him within 5 days.

**Patient Information**

**Patient Name:** SMITH, JOHN

**Date of Birth (age):** 01/31/1970 (42)

**Assessment Date:** 05/28/2012

**Primary Telephone #:** (111) 111-1111

**Alternate Phone #:** (111) 111-1111

**Best time to call:** Doesn't Matter

**Okay to leave message?** Yes

**Assessment Summary**

|                                        |                                                                                                                                                 |
|----------------------------------------|-------------------------------------------------------------------------------------------------------------------------------------------------|
| Current use/Amount:                    | 11-20 cigarettes / day                                                                                                                          |
| Years used:                            | 27                                                                                                                                              |
| Tobacco product(s) ever used:          | cigarettes, cigars                                                                                                                              |
| Level of addiction:                    | Medium                                                                                                                                          |
| Tobacco-related illness/symptoms:      | chest pain, high blood pressure, asthma, acid reflux or heartburn, upper respiratory infection or cold, coughing in the morning, sleep problems |
| Longest quit attempt:                  | 1-7 days                                                                                                                                        |
| Methods used to quit in past:          | "cold turkey", nicotine gum                                                                                                                     |
| Readiness to quit:                     | Ready to quit, but not soon                                                                                                                     |
| Factors that predict a poor prognosis: | Lives with someone who uses tobacco                                                                                                             |

**Confidence to quit (Patient rating: 5)**

|   |   |   |   |              |   |   |
|---|---|---|---|--------------|---|---|
| 1 | 2 | 3 | 4 | <b>((5))</b> | 6 | 7 |
|---|---|---|---|--------------|---|---|

Not at all confident

100% confident

*This report reflects only the information supplied by the patient and is not intended to replace clinical judgment. The physician retains full responsibility for decisions regarding treatment. © 2008 Polaris Health Directions, all rights reserved. Contact Polaris at: (267) 583-6336 - info@polarishealth.com - www.polarishealth.com*
